# Supplementary material
Source: PubMed Central journal article supplement (PMC9636059)
Supplement: mmc1.pdf [file mmc1.pdf]

**Supplemental information**

**Host transcriptional responses in nasal  
swabs identify potential SARS-CoV-2  
infection in PCR negative patients**

**Amanda M. Saravia-Butler, Jonathan C. Schisler, Deanne Taylor, Afshin Beheshti, Dan Butler, Cem Meydan, Jonathon Foox, Kyle Hernandez, Chris Mozsary, Christopher E. Mason, and Robert Meller**

# Supplementary Figure 1

## A

| PCR_SEQ       | All Data   | Remove duplicates | Filter low reads |
|---------------|------------|-------------------|------------------|
| PCR+ve No Seq | 16         | 10                | 6                |
| High          | 62         | 61                | 52               |
| Low           | 42         | 39                | 33               |
| Med           | 101        | 92                | 81               |
| Neg           | 380        | 343               | 275              |
| NF-N          | 49         | 46                | 42               |
| Viral_Neg     | 73         | 70                | 66               |
| Viral_Pos     | 9          | 9                 | 9                |
| <b>Total</b>  | <b>732</b> | <b>670</b>        | <b>564</b>       |
| <b>%</b>      | <b>11%</b> | <b>12%</b>        | <b>13%</b>       |

## B

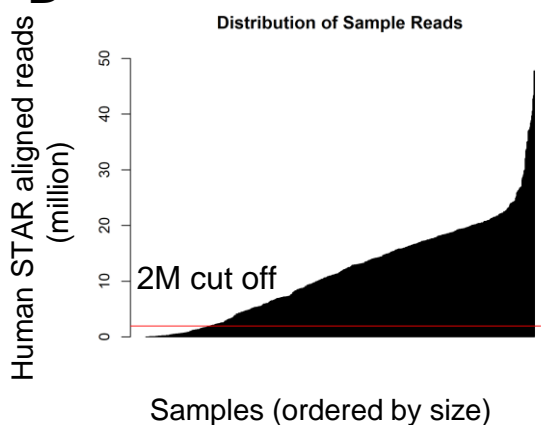

## C

| PCR                      | Seq (Actual)                |     | TP                       | FP | TN      | FN |
|--------------------------|-----------------------------|-----|--------------------------|----|---------|----|
|                          | +ve                         | -ve |                          |    |         |    |
| +ve                      | 166                         | 6   | 166                      | 6  | 275     | 42 |
| -ve                      | 42                          | 275 |                          |    |         |    |
| <b>Accuracy</b>          | TP + TN / TP + TN + FP + FN |     | (166+275)/(166+275+6+42) |    | 0.90184 |    |
| <b>Misclassification</b> | FP + FN / TP + TN + FP + FN |     | (6+42)/(166+275+6+42)    |    | 0.09816 |    |
| <b>Precision</b>         | TP / TP + FP                |     | 166/(166+6)              |    | 0.96512 |    |
| <b>Sensitivity</b>       | TP / TP + FN                |     | 166/(166+42)             |    | 0.79808 |    |
| <b>Specificity</b>       | TN / TN + FP                |     | 275/(275+6)              |    | 0.97865 |    |

Supplementary Figure 1 related to Figure 1. A. Table containing the number of samples in each PCR and sequencing type after each filtering step used in this analysis. Total indicates the total number of samples after each filtering step and % denotes the % of PCR negative samples that showed SARS-CoV-2 presence based on sequencing data. B. Histogram of the number of aligned human reads in each sample, showing effect of removing samples using a 2 million minimum read cut off. C. Calculation of accuracy, misclassification, precision, sensitivity, and specificity taking sequencing as the true value (TP= true positive, TN= True Negative, FP= false Positive, FN = false negative; +ve = positive, -ve = negative).

## Supplementary Figure 2

| Plate ID     | Seq_Neg  | High      | Low       | Med       | Neq        | F-N       | Viral_Neg | Viral_Pos | Total      |
|--------------|----------|-----------|-----------|-----------|------------|-----------|-----------|-----------|------------|
| P1           | 3        | 8         | 10        | 15        | 11         |           | 3         |           | 50         |
| P10          |          | 12        | 9         | 17        | 27         | 8         | 4         | 2         | 79         |
| P11          |          | 6         | 3         | 7         | 19         | 6         | 4         | 1         | 46         |
| P12          |          | 5         | 3         | 13        | 16         | 10        | 4         | 3         | 54         |
| P2           |          | 1         | 1         | 3         | 43         | 3         | 9         |           | 60         |
| P3           | 3        | 2         | 1         | 1         | 18         |           | 2         |           | 27         |
| P4           |          | 3         |           | 3         | 19         | 2         | 4         | 1         | 32         |
| P5           |          | 1         |           | 2         | 18         | 2         | 2         |           | 25         |
| P6           |          | 5         |           | 4         | 31         | 4         | 7         | 1         | 52         |
| P7           |          | 4         |           | 9         | 24         | 1         | 6         |           | 44         |
| P8           |          | 2         | 3         | 2         | 24         | 3         | 8         |           | 42         |
| P9           |          | 3         | 3         | 5         | 25         | 3         | 13        | 1         | 53         |
| <b>Total</b> | <b>6</b> | <b>52</b> | <b>33</b> | <b>81</b> | <b>275</b> | <b>42</b> | <b>66</b> | <b>9</b>  | <b>564</b> |

Supplementary Figure 2 relating the Figure 1. Table showing break down of numbers of samples sequenced by sequencing plate batch.

# Supplementary Figure 3

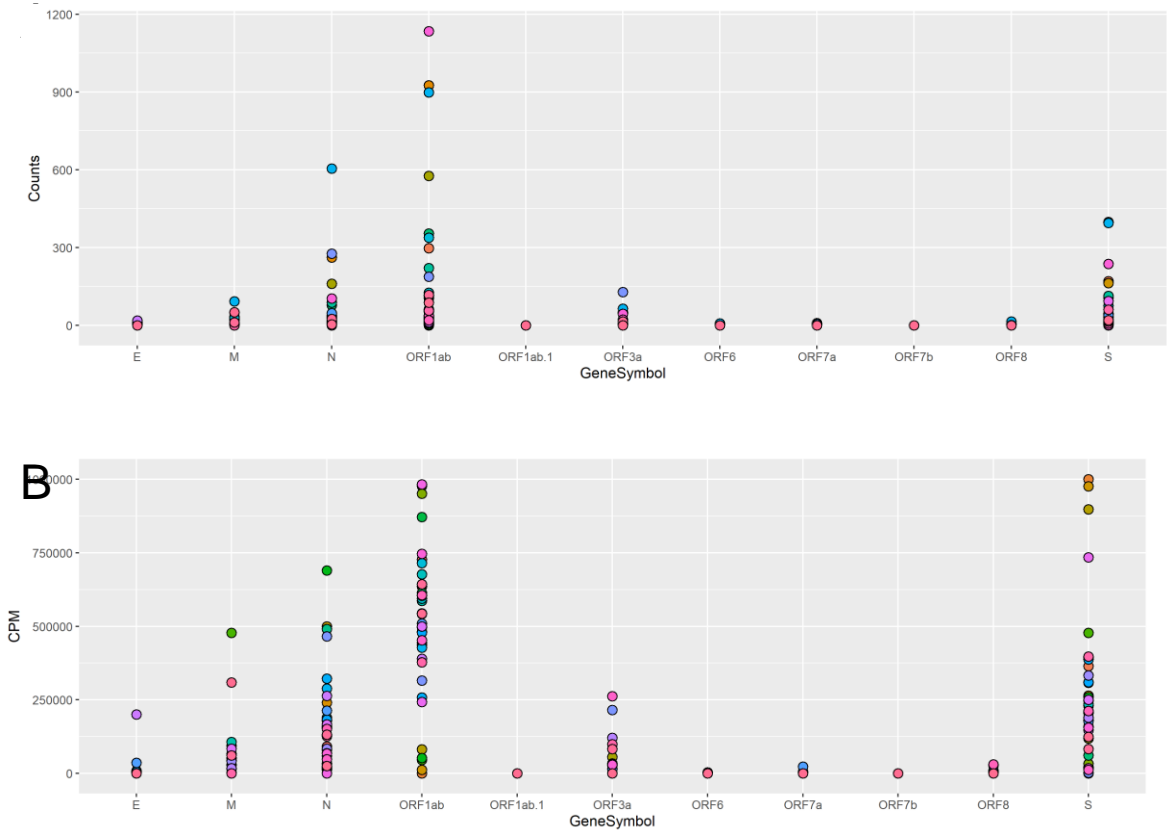

Supplementary Figure 3 Related to Fig 2. Levels of SARS-CoV-2 aligned reads by genomic location as with and without library size normalization. A. Total read counts per sample as determined by gene alignment. B Read counts were converted to CPM and plotted for each PCR negative sequencing positive sample.

# Supplementary Figure 4

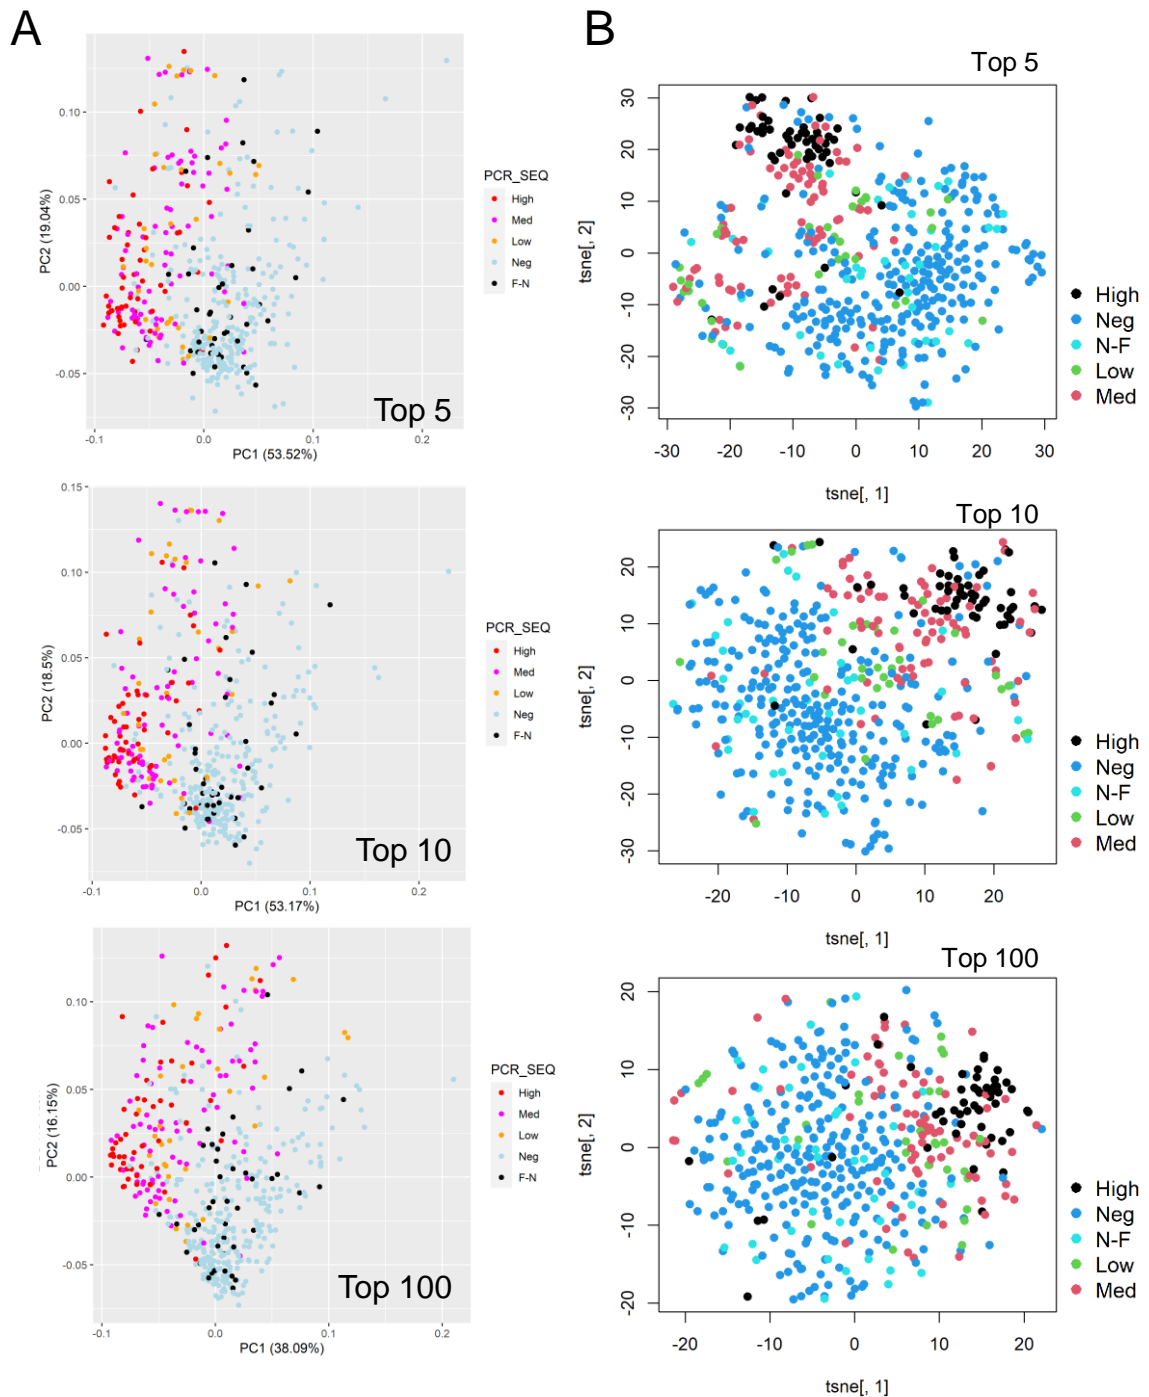

Supplementary Figure 4 related to Fig 3. A. PCA and B. tSNE plots of the top 5, 10 and 100 differentially expressed genes. Data were filtered for differentially expressed genes ( $\text{adj } p < 0.05$  (FDR)  $\pm 1.2$  fold change vs negative control samples). Data from High, Med, Low and F-N, versus Neg subjects (viral load status) were then filtered for top 100, 10, and 5 differentially expressed genes, and expression values were used for principal component analysis and tSNE analysis (see script). Data were colored based on viral load status. Data are from the 483 samples with greater than 2 million aligned human reads. These data show the high degree of variance in the uncorrected data.

## Supplementary Figure 5

|                      | <i>Df</i> | <i>Sum Sq</i> | <i>Mean Sq</i> | <i>F value</i> | <i>Pr(&gt;F)</i> |
|----------------------|-----------|---------------|----------------|----------------|------------------|
| Viral Load           | 4         | 0             | 0              | 0              | 1                |
| Cell_Type            | 4         | 70.2          | 17.549         | 616.013        | <2e-16 ***       |
| Viral Load:Cell_Type | 16        | 0.72          | 0.045          | 1.581          | 0.0657 .         |
| Residuals            | 2390      | 68.09         | 0.028          |                |                  |

---

Signif. codes: 0 '\*\*\*' 0.001 '\*\*' 0.01 '\*' 0.05 '.' 0.1 ' ' 1

|          | <i>diff</i> | <i>lwr</i> | <i>upr</i> | <i>p adj.</i> |
|----------|-------------|------------|------------|---------------|
| Med-High | -0.0003     | -0.0369    | 0.03636    | 1             |
| Low-High | -0.0002     | -0.046     | 0.04571    | 1             |
| Neg-High | -0.0002     | -0.0314    | 0.03096    | 1             |
| F-N-High | 2.3E-06     | -0.0427    | 0.04275    | 1             |
| Low-Med  | 0.0001      | -0.0425    | 0.04266    | 1             |
| Neg-Med  | 5.4E-05     | -0.026     | 0.0261     | 1             |
| F-N-Med  | 0.00026     | -0.0389    | 0.03944    | 1             |
| Neg-Low  | -5E-05      | -0.038     | 0.03791    | 1             |
| F-N-Low  | 0.00016     | -0.0478    | 0.04809    | 1             |
| F-N-Neg  | 0.0002      | -0.0339    | 0.03434    | 1             |

Supplementary Figure 5 related to Fig 6D. ANOVA results for cell proportion data.
